# Supplementary material for: Understanding the effects of vicinal carbon substituents and configuration on organofluorine hydrogen-bonding interaction
Source: Royal Society of Chemistry journal article supplement (doi:10.1039/c8ra08122k), 2018-01-01
Supplement: c8ra08122k1.pdf [file c8ra08122k1.pdf]

## Supporting Information for

### **Understanding the effects of vicinal carbon substituents and configuration on organic fluorine hydrogen-bonding interaction**

Qing-Qing Jia<sup>a</sup>, Qingzhong Li<sup>b</sup>, Mo Luo<sup>a</sup>, Hai-Bei Li<sup>a\*</sup>

<sup>a</sup> *School of Ocean, Shandong University, Weihai 264209, People's Republic of China*

<sup>b</sup> *The Laboratory of Theoretical and Computational Chemistry, School of Chemistry and Chemical Engineering, Yantai University, Yantai 264005, People's Republic of China*

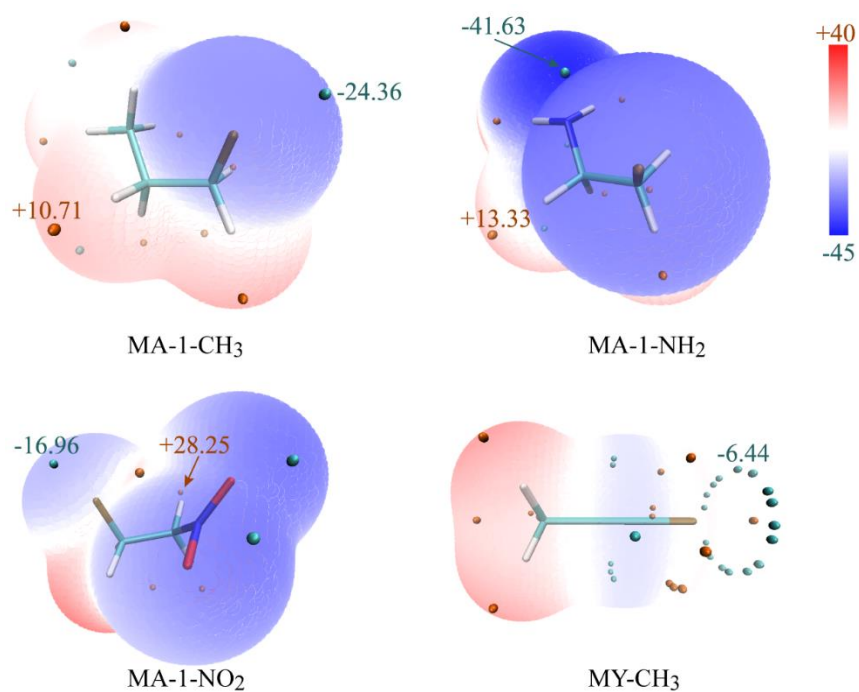

Figure S1. ESP-mapped molecular vdW surface for ortho-CH<sub>2</sub>CH<sub>3</sub>CH<sub>2</sub>F, ortho-CH<sub>2</sub>NH<sub>2</sub>CH<sub>2</sub>F, ortho-CH<sub>2</sub>NO<sub>2</sub>CH<sub>2</sub>F and CH<sub>3</sub>CCF, in kcal/mol. The elements of F, N, O, C and H were represented as ochre, blue, red, cyan and gray, respectively.

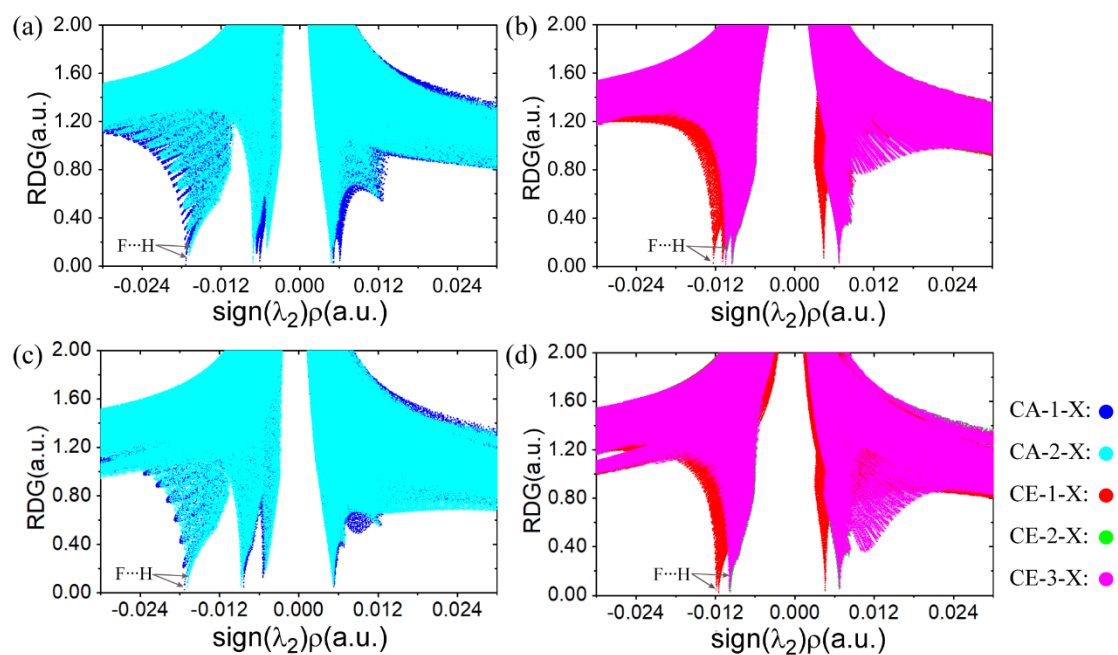

Figure S2. Scatters of the reduced density gradient, RDG, versus the electron density multiplied by the sign of the second Hessian eigenvalue,  $\text{sign}(\lambda_2)\rho$  for complexes (a) CA-1-F and CA-2-F; (b) CE-1-F, CE-2-F, and CE-3-F; (c) CA-1-Br and CA-2-Br; (d) CE-1-Br, CE-2-Br, and CE-3-Br.

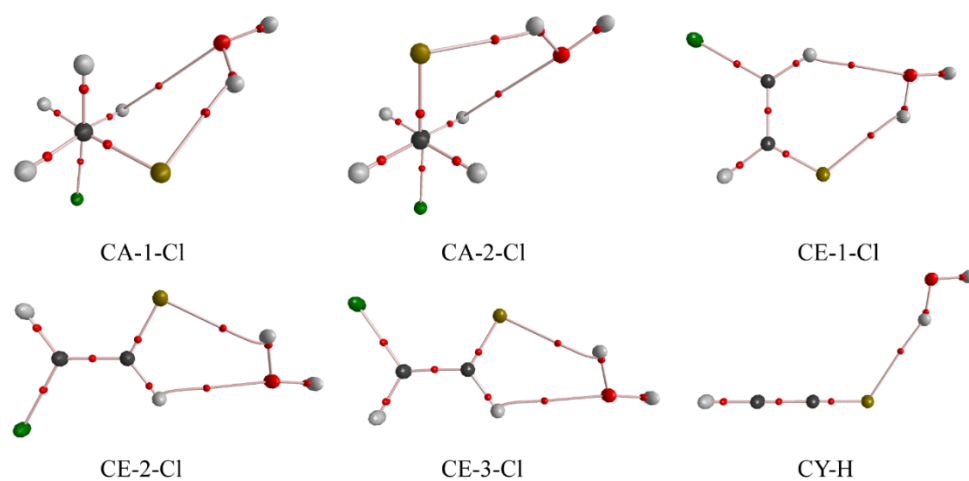

Figure S3. Molecular graphs of complex with bond critical points (BCPs) represented by red dots. The gray, red, green, black and ochre balls represent for H, O, Cl, C and F atoms, respectively. MP2/aug-cc-pVTZ level.
